# Supplementary material for: Serial Assessment of Serum HMGB1 and △SOFA for Predicting 28-Day Mortality in Sepsis Patients: A Prospective Cohort Study in the Emergency Department
Source: Research Square preprint supplement (doi:10.21203/rs.3.rs-7599267/v1), 2025-10-03
Supplement: Supplementary file 1 [file ffc42ce73cfbab3308016dc8.pdf]

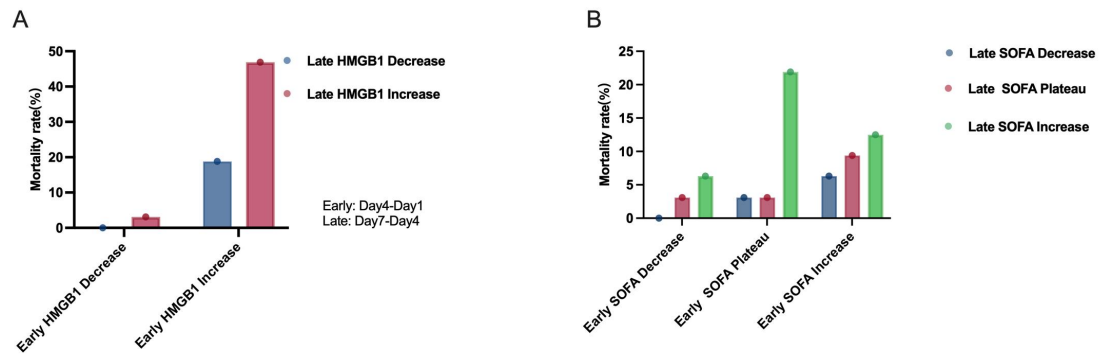

**Fig.s1** Changes in the serum HMGB1/SOFA mortality rate in sepsis patients from the initial three-days to the second three-days after admission. A)HMGB1; B)SOFA.

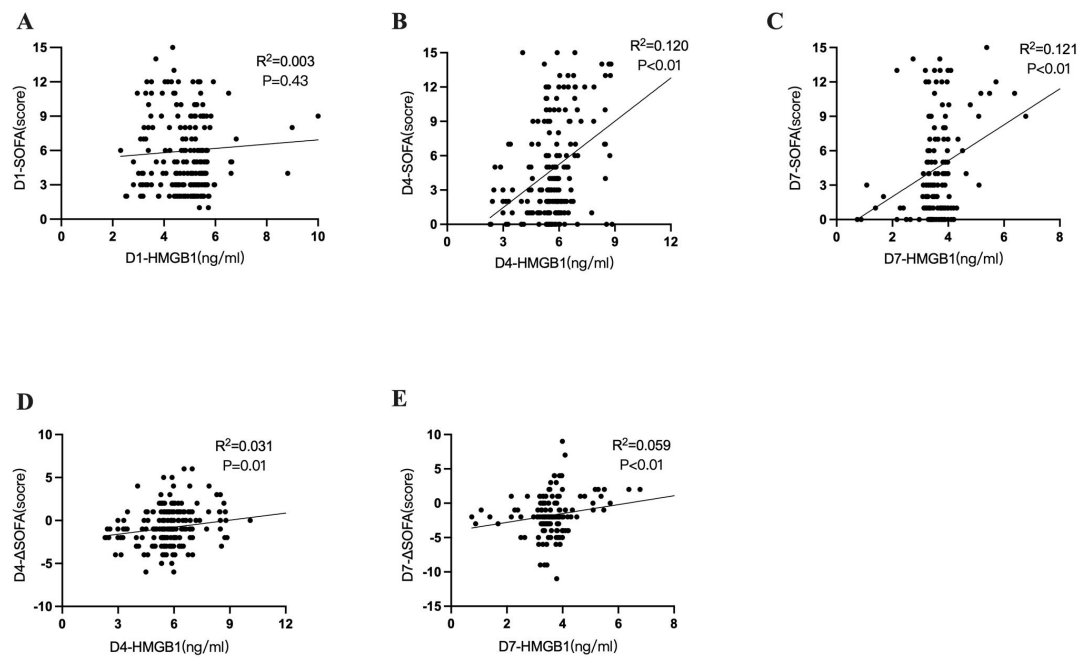

**Fig.s2** Correlations of serum HMGB1 levels and SOFA score in sepsis patients.

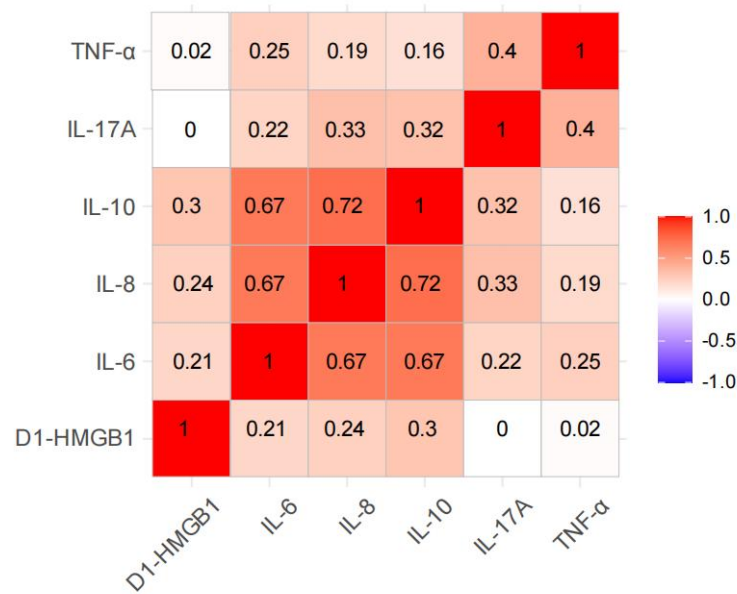

**Fig.s3** Correlations of serum HMGB1 levels and inflammatory factors in sepsis patients.

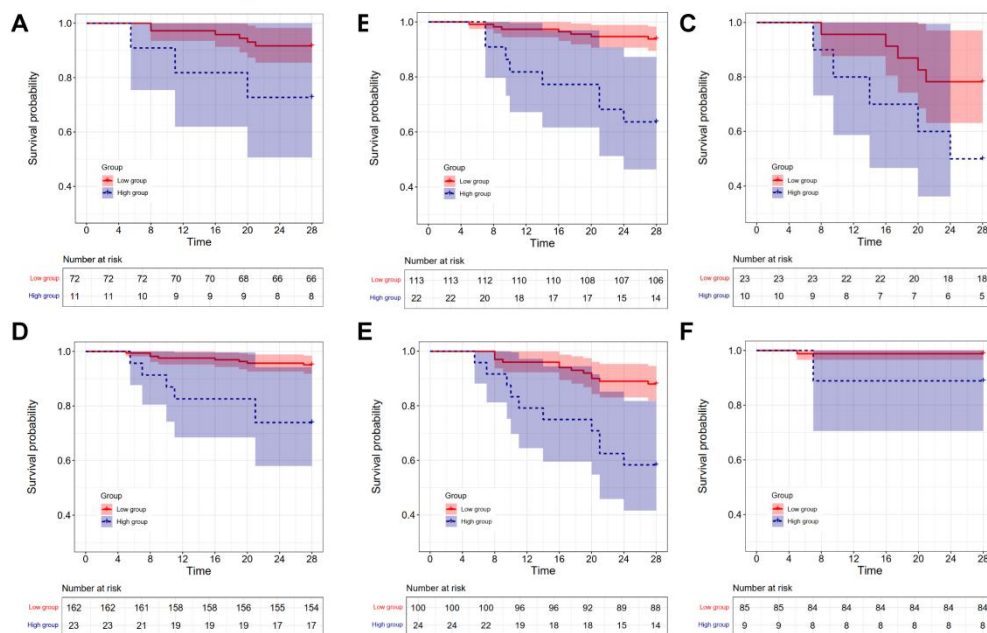

**Fig.s4** Kaplan-Meier estimates of survival rate distribution on D4-HMGB1 among patients with sepsis complicated with AKI, autoimmune and respiration disease. A) AKI, B) non-AKI; C) autoimmune; D) non-autoimmune; E) respiration disease;

F)non-respiration disease.
